# Supplementary material for: A systemic study on the vulnerability and fatality of prostate cancer patients towards COVID-19 through analysis of the TMPRSS2, CXCL10 and their co-expressed genes
Source: PubMed Central journal article supplement (PMC9576478; doi:10.5808/gi.22012), 2022-09-30
Supplement: gi-22012suppl1.pdf [file gi-22012suppl1.pdf]

Supplementary file 1

Table 1. A list of genetic alterations in *TMPRSS2* protein sequences associated with prostate cancer development.

| Study of Origin                                                             | Sample Size | Protein Change | Mutation Type     | Sample ID                        |
|-----------------------------------------------------------------------------|-------------|----------------|-------------------|----------------------------------|
| Metastatic castration-sensitive prostate cancer (MSK, Clin Cancer Res 2020) | 424         | R202K          | Missense_Mutation | P-0026237-T01-IM6                |
|                                                                             |             | W520Gfs*40     | Frame_Shift_Ins   | P-0022252-T01-IM6                |
| Metastatic Prostate Adenocarcinoma (SU2C/PCF Dream Team, PNAS 2019)         | 444         | V396E          | Missense_Mutation | PROS01448-6115247-Tumor-SM-67ES2 |
|                                                                             |             | W176C          | Missense_Mutation | PROS01448-6115247-Tumor-SM-67ES2 |
|                                                                             |             | D134Y          | Missense_Mutation | MO_1184-Tumor                    |
|                                                                             |             | V396A          | Missense_Mutation | PROS11496-6115321-Tumor-SM-6CNQ5 |
|                                                                             |             | M372V          | Missense_Mutation | PROS11496-6115286-Tumor-SM-6CNPY |
|                                                                             |             | X358_splice    | Splice_Region     | PM158-TM                         |
|                                                                             |             | X337_splice    | Splice_Region     | PRAD-6115593.0-Tumor-SM-B2XRV    |

|                                                                |     |                                  |                                                                                  |                                                 |
|----------------------------------------------------------------|-----|----------------------------------|----------------------------------------------------------------------------------|-------------------------------------------------|
| Metastatic Prostate Cancer (SU2C/PCF Dream Team, Cell 2015)    | 150 | V396E<br>W176C<br>D134Y<br>W384C | Missense_Mutation<br>Missense_Mutation<br>Missense_Mutation<br>Missense_Mutation | 6115247<br>6115247<br>MO_1184<br>SC_9089        |
| Neuroendocrine Prostate Cancer (Multi-Institute, Nat Med 2016) | 114 | N358=                            | Splice_Region                                                                    | WCMC158_1_C                                     |
| Prostate Adenocarcinoma (CPC-GENE, Nature 2017)                | 477 | E178K                            | Missense_Mutation                                                                | TCGA-CH-5740-01                                 |
| Prostate Adenocarcinoma (Fred Hutchinson CRC, Nat Med 2016)    | 176 | G295D<br>G295D<br>G295D          | Missense_Mutation<br>Missense_Mutation<br>Missense_Mutation                      | 05-165K5_LUNG<br>05-165M1_LN<br>05-165O_ADRENAL |

|                                                       |      |                |                   |                   |
|-------------------------------------------------------|------|----------------|-------------------|-------------------|
| Prostate<br>Adenocarcinoma<br>(MSK, Eur Urol<br>2020) | 1465 | V49M           | Missense_Mutation | P-0010518-T01-IM5 |
|                                                       |      | V396E          | Missense_Mutation | P-0013503-T02-IM6 |
|                                                       |      | W176C          | Missense_Mutation | P-0013503-T02-IM6 |
|                                                       |      | G462D          | Missense_Mutation | P-0008592-T01-IM5 |
|                                                       |      | R409Mfs*8      | Frame_Shift_Del   | P-0002439-T01-IM3 |
|                                                       |      | X80_splice     | Splice_Site       | P-0009546-T01-IM5 |
|                                                       |      | R165K          | Missense_Mutation | P-0026237-T01-IM6 |
|                                                       |      | X6_splice      | Splice_Site       | P-0013032-T02-IM6 |
|                                                       |      | I286del        | In_Frame_Del      | P-0015597-T01-IM6 |
|                                                       |      | V237Afs*6      | Frame_Shift_Del   | P-0015618-T01-IM6 |
|                                                       |      | 3              | Frame_Shift_Del   | P-0016941-T01-IM6 |
|                                                       |      | S238Lfs*5      | Frame_Shift_Ins   | P-0022252-T01-IM6 |
|                                                       |      | W483Gfs*4<br>0 | Missense_Mutation | P-0021183-T01-IM6 |
| M349I                                                 |      |                |                   |                   |

|                                                                        |                   |                 |                   |                            |
|------------------------------------------------------------------------|-------------------|-----------------|-------------------|----------------------------|
| Prostate<br>Adenocarcinoma<br>(MSKCC/DFCI,<br>Nature Genetics<br>2018) | 1013              | N304del         | In_Frame_Del      | TCGA-V1-A9OX-01            |
|                                                                        |                   | G295D           | Missense_Mutation | 05-165O_ADRENAL            |
|                                                                        |                   | D171Y           | Missense_Mutation | MO_1184                    |
|                                                                        |                   | X395_splice     | Splice_Region     | PM156                      |
|                                                                        |                   | V433E           | Missense_Mutation | PROS01448-6115247-SM-67ES2 |
|                                                                        |                   | W213C           | Missense_Mutation | PROS01448-6115247-SM-67ES2 |
|                                                                        |                   | M409V           | Missense_Mutation | PROS11496-6115286-SM-6CNPY |
|                                                                        |                   | V433A           | Missense_Mutation | PROS11496-6115321-SM-6CNQ5 |
|                                                                        |                   | E215K           | Missense_Mutation | TCGA-CH-5740-01            |
|                                                                        |                   | I369N           | Missense_Mutation | TCGA-EJ-7793-01            |
| S116*                                                                  | Nonsense_Mutation | TCGA-HC-A8D0-01 |                   |                            |
| Prostate<br>Adenocarcinoma<br>(TCGA, Cell 2015)                        | 333               | I332N           | Missense_Mutation | TCGA-EJ-7793-01            |
|                                                                        |                   | S79*            | Nonsense_Mutation | TCGA-HC-A8D0-01            |

|                                                      |     |           |                   |                   |
|------------------------------------------------------|-----|-----------|-------------------|-------------------|
| Prostate Cancer<br>(MSKCC, JCO<br>Precis Oncol 2017) | 504 | G462D     | Missense_Mutation | P-0008592-T01-IM5 |
|                                                      |     | V396A     | Missense_Mutation | P-0001071-T01-IM3 |
|                                                      |     | R409Mfs*8 | Frame_Shift_Del   | P-0002439-T01-IM3 |
