# Supplementary material for: A systemic study on the vulnerability and fatality of prostate cancer patients towards COVID-19 through analysis of the TMPRSS2, CXCL10 and their co-expressed genes
Source: PubMed Central journal article supplement (PMC9576478; doi:10.5808/gi.22012), 2022-09-30
Supplement: gi-22012suppl2.pdf [file gi-22012suppl2.pdf]

Table 2. The List of curated genes directly associated with COVID-19 development.

| <b>Name of gene</b> | <b>Curated relationship</b> | <b>Inference Score</b> |
|---------------------|-----------------------------|------------------------|
| <i>CCL2</i>         | Biomarker                   | 34.37                  |
| <i>TNF</i>          | Biomarker                   | 30.81                  |
| <i>IL6</i>          | Biomarker                   | 28.12                  |
| <i>CXCL8</i>        | Biomarker                   | 27.31                  |
| <i>IL1B</i>         | Biomarker                   | 26.53                  |
| <i>IL10</i>         | Biomarker                   | 26.16                  |
| <i>IL2</i>          | Biomarker                   | 21.02                  |
| <i>AGT</i>          | Biomarker                   | 19.98                  |
| <i>CCL3</i>         | Biomarker                   | 13.94                  |
| <i>CXCL10</i>       | Biomarker                   | 13.69                  |
| <i>IL7</i>          | Biomarker                   | 9.34                   |

|                 |                                  |      |
|-----------------|----------------------------------|------|
| <i>ACE2</i>     | Biomarker and Therapeutic target | 7.69 |
| <i>CSF3</i>     | Biomarker                        | 7.09 |
| <i>CRP</i>      | Biomarker                        | 6.88 |
| <i>BTK</i>      | Biomarker                        | 6.84 |
| <i>TMPRSS2</i>  | Biomarker                        | 5.56 |
| <i>IL2RA</i>    | Biomarker                        | 5.23 |
| <i>TMPRSS4</i>  | Biomarker                        | 3    |
| <i>TMEM106B</i> | Biomarker                        | 2.86 |
| <i>LZTFL1</i>   | Biomarker                        | 2.82 |
